# Supplementary material
Source: PubMed Central journal article supplement (PMC4718749)
Supplement: NIHMS738582-supplement-Supp_TableS1.pdf [file NIHMS738582-supplement-Supp_TableS1.pdf]

**Supplementary Table 1. Recommended Drug Regimens for Treatment-Naïve Patients  
with Genotype I Hepatitis C**

|                              | <b>Sofosbuvir/Ledipasvir</b> | <b>Three-Drug Regimen</b> |
|------------------------------|------------------------------|---------------------------|
| <i>Chronic Hepatitis C</i>   |                              |                           |
| Genotype 1a                  | 12 weeks                     | 12 weeks + RBV            |
| Genotype 1b                  |                              | 12 weeks                  |
| <i>Compensated Cirrhosis</i> |                              |                           |
| Genotype 1a                  | 12 weeks                     | 24 weeks + RBV            |
| Genotype 1b                  |                              | 12 weeks                  |

**Note:** Three-Drug Regimen: ombitasvir, ritonavir, paritaprevir, dasabuvir. Source:

American Association for the Study of Liver Diseases ([hcvguidelines.org](http://hcvguidelines.org)), Accessed

8/8/2015.
